# Supplementary material for: Complete mitochondrial genomes of four deep-sea echinoids: conserved mitogenome organization and new insights into the phylogeny and evolution of Echinoidea
Source: PeerJ. 2022 Jul 28;10:e13730. doi: 10.7717/peerj.13730 (PMC9339218; doi:10.7717/peerj.13730)
Supplement: Table S1 [file peerj-10-13730-s002.xls]

## Sheet: Sheet1
>Seq1 [organism=Aspidodiadema arcitum] mitochondrion, complete genome
ATGCAACTAAGACGATGATTATTTTCTACCAATCACAAGGACATTGGAACTCTTTATTTAATTTTTGGGGCTTGAGCCGGAATGGTTGGAACAGCCATGAGTGTTATTATTCGAGCCGAACTAGCCCAACCTGGCTCCCTCCTTCAAGATGACCAAATCTATAAAGTGGTAGTAACTGCCCATGCACTAGTTATGATTTTCTTTATGGTAATGCCTATAATGATAGGAGGATTTGGAAAATGACTTGTTCCTCTTATGATAGGCGCTCCCGATATGGCCTTTCCCCGCATGAAAAAAATGAGATTTTGGCTAATCCCTCCTTCCTTTATTCTTCTATTAGCCTCTGCAGGAGTAGAAAGCGGGGCAGGAACAGGATGAACCATCTACCCTCCGCTATCT…
>Seq1 [organism=Araeosoma owstoni] mitochondrion, complete genome
ATGCAACTAAAACGATGATTATTTTCTACCAATCACAAGGATATCGGAACACTCTATTTAATATTTGGCGCCTGAGCAGGAATGGTTGGCACAGCTATGAGAGTTATTATTCGAGCTGAACTAGCTCAACCAGGATCACTTCTTCAAGACGACCAAATCTATAAAGTCATAGTTACAGCACACGCTCTAGTAATGATATTTTTCATGGTAATGCCAATAATGATAGGAGGCTTTGGAAATTGACTAATTCCTCTTATGATAGGAGCTCCAGATATGGCTTTCCCACGAATGAAAAAAATGAGTTTCTGATTAATACCCCCATCCTTCATTTTACTACTAGCCTCCGCAGGAGTAGAAAGAGGAGCTGGAACAGGATGAACCATTTACCCCCCATTATCA…
>Seq1 [organism=Phormosoma bursarium] mitochondrion, complete genome
ATGCAACTAAGACGATGATTATTTTCAACCAATCATAAGGACATCGGAACACTTTATTTAATCTTTGGAGCCTGAGCAGGAATGGTAGGAACTGCCATGAGAGTTATAATTCGTACTGAACTAGCCCAACCAGGGTCTCTATTACAAGACGACCAAATCTATAAAGTAATAGTTACTGCCCATGCCCTAGTAATGATCTTTTTTATGGTAATGCCCATAATGATAGGAGGATTCGGTAATTGACTAATTCCTCTTATGATAGGTGCACCAGATATGGCATTCCCCCGAATGAAAAAAATGAGTTTTTGGCTTATCCCCCCTTCGTTTATCCTACTCTTAGCCTCTGCAGCTATAGAAAGAGGAGCAGGGACTGGATGAACAATCTATCCCCCACTATCT…
>Seq1 [organism=Caenopedina pulchella] mitochondrion, complete genome
ATGCAATTAAAACGATGATTATTTTCAACCAATCACAAGGACATTGGAACACTTTATTTAATTTTCGGTGCCTGAGCAGGCATGGTTGGTACAGCCATGAGAGTTATTATTCGAGCCGAACTAGCCCAACCTGGATCCTTACTTCAAGACGACCAAATCTACAAAGTTATAGTAACAGCACATGCCTTAGTAATGATATTTTTCATGGTTATGCCAATCATGATAGGAGGCTTTGGAAATTGACTTATCCCTCTTATGATAGGCGCACCAGATATGGCCTTTCCTCGAATGAAAAAAATGAGTTTTTGATTAATACCCCCTTCATTTATTTTACTACTTGCTTCTGCAAGAGTTGAAAGAGGAGCCGGCACAGGATGAACTATATACCCACCCCTATCA…
