# Supplementary material for: Complete mitochondrial genomes of four deep-sea echinoids: conserved mitogenome organization and new insights into the phylogeny and evolution of Echinoidea
Source: PeerJ. 2022 Jul 28;10:e13730. doi: 10.7717/peerj.13730 (PMC9339218; doi:10.7717/peerj.13730)
Supplement: Table S2 [file peerj-10-13730-s003.xls]

## Sheet: Sheet1
Subclass	Order	Species	GenBank NO./SRA	Habitat
Cidaroidea	Cidaroida	Eucidaris tribuloides	MH614961	Shallow water
		Stylocidaris reini	MK609483	Deep sea
		Prionocidaris baculosa	MK609482	Shallow water
Euechinoidea	Aspidodiadematoida	Aspidodiadema arcitum	ON254173	Deep sea
	Pedinoida	Caenopedina pulchella	ON254174	Deep sea
	Echinothurioida	Phormosoma bursarium	ON254175	Deep sea
		Araeosoma owstoni	ON254176	Both
	Diadematoida	Diadema setosum	KX385835	Shallow water
		Echinothrix calamaris	MK609484	Shallow water
		Echinothrix diadema	KX385836	Shallow water
	Spatangoida	Echinocardium cordatum	FN562581	Shallow water
		Nacospatangus alta	KC990834	Shallow water
		Echinocardium mediterraneum	SRR1324910	Shallow water
		Meoma ventricosa	SRR7513582	Shallow water
		Brissus obesus	SRR7513590	Shallow water
	Echinolampadacea	Sinaechinocyamus mai	MN103227	Shallow water
		Echinarachnius parma	SRR1139193	Shallow water
		Dendraster excentricus	SRR2844623	Shallow water
		Echinocyamus crispus	SRR7513576	Shallow water
		Conolampas sigsbei	SRR7513579	Deep sea
		Mellita tenuis	SRR7513583	Shallow water
	Clypeasteroida	Clypeaster subdepressus	SRR7513586	Shallow water
		Clypeaster rosaceus	SRR7513591	Shallow water
	Arbacioida	Arbacia lixula	X80396	Shallow water
		Pygmaeocidaris prionigera	MW354512	Deep sea
	Stomopneustoida	Glyptocidaris crenularis	KX638403	Shallow water
		Stomopneustes variolaris	MW147664	Shallow water
	Camarodonta	Allocentrotus fragilis	KC898200	Both
		Hemicentrotus pulcherrimus	KC898202	Shallow water
		Mesocentrotus franciscanus	KC898199	Shallow water
		Mesocentrotus nudus	KC898201	Shallow water
		Pseudocentrotus depressus	KC898203	Shallow water
		Strongylocentrotus droebachiensis	KC898196	Shallow water
		Strongylocentrotus intermedius	KC898198	Shallow water
		Strongylocentrotus pallidus	KC898197	Shallow water
		Strongylocentrotus purpuratus	X12631	Shallow water
		Colobocentrotus mertensii	MK609487	Shallow water
		Echinometra mathaei	KJ680291	Shallow water
		Echinometra sp.	MH685644	Shallow water
		Heliocidaris crassispina	KC479025	Shallow water
		Heterocentrotus mammillatus	KJ680292	Shallow water
		Loxechinus albus	KC490910	Shallow water
		Paracentrotus lividus	J04815	Shallow water
		Sterechinus neumayeri	KJ680295	Both
		Pseudoboletia maculata	MK609486	Shallow water
		Tripneustes gratilla	KJ680294	Shallow water
		Lytechinus variegatus	MG676469	Shallow water
		Mespilia globulus	KJ680293	Shallow water
		Salmacis bicolor rarispina	KU302104	Shallow water
		Salmacis sphaeroides	KU302103	Shallow water
		Temnopleurus hardwickii	KP070768	Shallow water
		Temnopleurus reevesii	KU302106	Both
		Temnopleurus toreumaticus	KU302105	Shallow water
	Holasteroida	Cystechinus giganteus	SRR7513585	Deep sea
