# Supplementary material for: Complete mitochondrial genomes of four deep-sea echinoids: conserved mitogenome organization and new insights into the phylogeny and evolution of Echinoidea
Source: PeerJ. 2022 Jul 28;10:e13730. doi: 10.7717/peerj.13730 (PMC9339218; doi:10.7717/peerj.13730)
Supplement: Table S3 [file peerj-10-13730-s004.xls]

## Sheet: Nucleotide
Subset	Best Model	Partition names
1	GTR+I+G	atp6_codon1
2	GTR+I+G	nad1_codon2, atp6_codon2
3	SYM+I+G	cox1_codon1
4	GTR+I+G	cox1_codon2
5	SYM+I+G	cox2_codon1
6	GTR+I+G	cox2_codon2
7	SYM+I+G	cox3_codon1, cytb_codon1
8	TVM+I+G	cytb_codon2, cox3_codon2
9	GTR+I+G	nad1_codon1
10	TVM+I+G	nad2_codon1
11	GTR+I+G	nad2_codon2
12	SYM+I+G	nad3_codon1
13	GTR+I+G	nad3_codon2, nad4_codon2
14	GTR+I+G	nad4_codon1
15	GTR+G	nad4l_codon1
16	GTR+G	nad6_codon2, nad4l_codon2
17	GTR+I+G	nad5_codon1
18	GTR+I+G	nad5_codon2
19	GTR+I+G	nad6_codon1

## Sheet: Amino acid
Subset	Best Model	Partition names
1	JTT+I+G+F	atp8
2	MtArt+I+G	atp6
3	MtArt+I+G	cox1
4	MtMAm+I+G+F	cox2
5	MtArt+I+G	cox3
6	MtArt+I+G	cytb
7	MtArt+I+G+F	nad1
8	MtMAm+I+G+F	nad2
9	MtMAm+I+G+F	nad3
10	MtArt+I+G+F	nad4
11	JTT+I+G+F	nad4l
12	JTT+I+G+F	nad5
13	MtREV+I+G+F	nad6
