# Supplementary material for: Complete mitochondrial genomes of four deep-sea echinoids: conserved mitogenome organization and new insights into the phylogeny and evolution of Echinoidea
Source: PeerJ. 2022 Jul 28;10:e13730. doi: 10.7717/peerj.13730 (PMC9339218; doi:10.7717/peerj.13730)
Supplement: Table S4 [file peerj-10-13730-s005.xls]

## Sheet: Aspidodiadema arcitum
Name	Strand	Start	Stop	Start-codon	Stop-codon	Length
cox1	F	1	1554	ATG	TAA	1554
trnR-cga	F	1566	1632			67
nad4l	F	1635	1928	ATC	TAA	294
cox2	F	1928	2617	ATG	TAA	690
trnK-aag	F	2619	2689			71
atp8	F	2690	2857	GTG	TAG	168
atp6	F	2848	3537	ATG	TAA	690
cox3	F	3541	4323	ATG	TAA	783
trnS2-tca	R	4323	4392			70
nad3	F	4409	4759	ATG	TAA	351
nad4	F	4771	6148	ATG	T	1378
trnH-cac	F	6150	6217			68
trnS1-agc	F	6219	6286			68
nad5	F	6287	8209	ATG	TAA	1923
nad6	R	8210	8698	ATG	TAG	489
cob	F	8720	9862	ATG	TAG	1143
trnF-ttc	F	9862	9934			73
rrnS	F	9935	10826			892
trnE-gaa	F	10827	10899			73
trnT-aca	F	10900	10971			72
Control Region	F	10972	11252			281
trnP-cca	F	11253	11321			69
trnQ-caa	R	11325	11396			72
trnN-aac	F	11397	11470			74
trnL1-cta	F	11470	11541			72
trnA-gca	R	11541	11613			73
trnW-tga	F	11612	11682			71
trnC-tgc	F	11682	11748			67
trnV-gta	R	11748	11817			70
trnM-atg	F	11844	11918			75
trnD-gac	R	11924	11993			70
trnY-tac	F	12002	12072			71
trnG-gga	F	12078	12145			68
trnL2-tta	F	12145	12219			75
nad1	F	12219	13190	ATG	TAA	972
trnI-atc	F	13194	13265			72
nad2	F	13266	14324	ATG	TAA	1059
rrnL	F	14325	15870			1546

## Sheet: Caenopedina pulchella
Name	Strand	Start	Stop	Start-codon	Stop-codon	Length
cox1	F	1	1554	ATG	TAA	1554
trnR-cga	F	1565	1631			67
nad4l	F	1634	1927	ATT	TAA	294
cox2	F	1932	2621	ATG	TAA	690
trnK-aag	F	2622	2695			74
atp8	F	2695	2862	GTG	TAA	168
atp6	F	2853	3542	ATG	TAA	690
cox3	F	3546	4328	ATG	TAA	783
trnS2-tca	R	4328	4397			70
nad3	F	4414	4764	ATG	TAA	351
nad4	F	4777	6154	ATG	T	1378
trnH-cac	F	6156	6223			68
trnS1-agc	F	6224	6293			70
nad5	F	6293	8206	ATG	TAA	1914
nad6	R	8207	8695	ATG	TAG	489
cob	F	8717	9859	ATG	TAG	1143
trnF-ttc	F	9859	9932			74
rrnS	F	9933	10844			912
trnE-gaa	F	10845	10916			72
trnT-aca	F	10928	10998			71
Control Region	F	10999	11111			113
trnP-cca	F	11112	11180			69
trnQ-caa	R	11184	11255			72
trnN-aac	F	11268	11339			72
trnL1-cta	F	11340	11411			72
trnA-gca	R	11411	11480			70
trnW-tga	F	11483	11553			71
trnC-tgc	F	11553	11620			68
trnV-gta	R	11620	11690			71
trnM-atg	F	11699	11771			73
trnD-gac	R	11783	11852			70
trnY-tac	F	11865	11935			71
trnG-gga	F	11939	12006			68
trnL2-tta	F	12007	12081			75
nad1	F	12081	13052	ATG	TAA	972
trnI-atc	F	13054	13122			69
nad2	F	13125	14183	ATG	TAA	1059
rrnL	F	14184	15747			1564
Submission # 2573070

## Sheet: Phormosoma bursarium
Name	Strand	Start	Stop	Start-codon	Stop-codon	Length
cox1	F	1	1554	ATG	TAG	1554
trnR-cga	F	1568	1634			67
nad4l	F	1637	1930	ATC	TAA	294
cox2	F	1930	2619	ATG	TAA	690
trnK-aag	F	2621	2690			70
atp8	F	2691	2858	GTG	TAA	168
atp6	F	2849	3538	ATG	TAA	690
cox3	F	3542	4324	ATG	TAA	783
trnS2-tca	R	4324	4393			70
nad3	F	4410	4760	ATG	TAA	351
nad4	F	4785	6162	ATG	T	1378
trnH-cac	F	6164	6231			68
trnS1-agc	F	6233	6300			68
nad5	F	6301	8217	ATG	TAA	1917
nad6	R	8225	8713	ATG	TAG	489
cob	F	8736	9878	ATG	TAG	1143
trnF-ttc	F	9878	9950			73
rrnS	F	9951	10847			897
trnE-gaa	F	10848	10917			70
trnT-aca	F	10922	10996			75
Control Region	F	10997	11135			139
trnP-cca	F	11136	11204			69
trnQ-caa	R	11205	11279			75
trnN-aac	F	11281	11352			72
trnL1-cta	F	11353	11424			72
trnA-gca	R	11423	11494			72
trnW-tga	F	11493	11563			71
trnC-tgc	F	11563	11630			68
trnV-gta	R	11630	11699			70
trnM-atg	F	11727	11799			73
trnD-gac	R	11804	11873			70
trnY-tac	F	11883	11955			73
trnG-gga	F	11958	12025			68
trnL2-tta	F	12025	12099			75
nad1	F	12099	13070	ATG	TAA	972
trnI-atc	F	13072	13143			72
nad2	F	13144	14202	ATG	TAA	1059
rrnL	F	14203	15745			1543
Submission # 2573081

## Sheet: Araeosoma owstoni
Name	Strand	Start	Stop	Start-codon	Stop-codon	Length
cox1	F	1	1554	ATG	TAA	1554
trnR-cga	F	1565	1632			68
nad4l	F	1635	1928	ATC	TAA	294
cox2	F	1929	2618	ATG	TAA	690
trnK-aag	F	2620	2690			71
atp8	F	2691	2858	GTG	TAA	168
atp6	F	2849	3538	ATG	TAA	690
cox3	F	3542	4324	ATG	TAA	783
trnS2-tca	R	4324	4393			70
nad3	F	4410	4760	ATG	TAA	351
nad4	F	4772	6149	ATG	T	1378
trnH-cac	F	6151	6218			68
trnS1-agc	F	6222	6285			64
nad5	F	6288	8204	ATG	TAA	1917
nad6	R	8205	8693	ATG	TAG	489
cob	F	8719	9861	ATG	TAG	1143
trnF-ttc	F	9861	9932			72
rrnS	F	9933	10833			901
trnE-gaa	F	10834	10903			70
trnT-aca	F	10906	10981			76
Control Region	F	10982	11081			100
trnP-cca	F	11082	11149			68
trnQ-caa	R	11152	11223			72
trnN-aac	F	11230	11301			72
trnL1-cta	F	11302	11373			72
trnA-gca	R	11372	11441			70
trnW-tga	F	11447	11515			69
trnC-tgc	F	11516	11583			68
trnV-gta	R	11583	11653			71
trnM-atg	F	11660	11734			75
trnD-gac	R	11741	11810			70
trnY-tac	F	11822	11892			71
trnG-gga	F	11897	11965			69
trnL2-tta	F	11965	12039			75
nad1	F	12040	13011	ATG	TAA	972
trnI-atc	F	13012	13085	ATG	TAA	74
nad2	F	13085	14143			1059
rrnL	F	14144	15704			1561
