# Supplementary material for: Complete mitochondrial genomes of four deep-sea echinoids: conserved mitogenome organization and new insights into the phylogeny and evolution of Echinoidea
Source: PeerJ. 2022 Jul 28;10:e13730. doi: 10.7717/peerj.13730 (PMC9339218; doi:10.7717/peerj.13730)
Supplement: Table S5 [file peerj-10-13730-s006.xls]

## Sheet: Base composition
	mtDNA				PCG	PCG1st	PCG2nd	PCG3rd	rRNA	tRNA	CR	atp6	atp8	cox1	cox2	cox3	cytb	nad1	nad2	nad3	nad4	nad4l	nad5	nad6
Species	AT %	AT Skew	GC Skew		AT %
Diadema setosum	58.19	-0.0565389	-0.161923		57.8529	52.8826	59.4078	61.2683	57.8383	59.8318	52.6316	58.3697	46.2963	56.2863	56.7686	56.1538	57.193	58.5139	61.1742	60.3448	57.3711	58.7629	57.0533	59.0535
Echinothrix calamaris	56.43	-0.0614921	-0.158595		56.0677	51.6239	59.3766	57.2027	56.5361	57.6052	49.2754	56.0408	47.619	54.6744	57.2052	53.2051	56.1404	55.8308	57.5758	56.0345	55.7734	62.543	56.2173	53.7037
Echinothrix diadema	57.6	-0.0743056	-0.12385		57.1803	52.7254	59.0409	59.7746	55.3691	59.0556	49.6183	57.0597	43.8272	54.9968	57.6419	57.0513	57.6316	57.9979	59.5644	55.7471	56.0639	61.1684	55.9561	59.465
Echinocardium cordatum	58.62	0	-0.102248		58.2026	53.5565	60.1464	60.9048	59.7959	58.4139	46.875	61.6162	47.2727	55.5126	57.7875	55.7692	56.9298	56.8627	60.8902	58.046	58.5106	60.4811	59.0625	59.465
Nacospatangus alta	60.73	0.0163017	-0.0807232		60.6037	55.5875	60.1675	66.056	60.8269	59.4961	49.6124	61.9048	44.2424	56.6281	60.262	57.8205	60.7895	59.8555	62.4053	58.908	62.7451	61.1684	62.1283	60.0823
Sinaechinocyamus mai	62.96	-0.0231893	-0.165631		63.1239	56.5969	60.8115	71.9634	62.0563	61.8863	51.3889	66.0895	51.5152	60.735	62.1543	58.8462	62.0175	63.8803	66.5717	61.2069	63.6364	63.5739	63.7886	64.6091
Glyptocidaris crenularis	58.96	-0.0580054	-0.143275		58.2027	52.988	59.6547	61.9655	59.7603	59.8324	55.0336	57.8644	n/a	56.6086	57.7875	56.9231	57.7193	60.2683	59.8485	59.4828	58.7509	66.6667	56.8075	57.8189
Arbacia lixula	62.49	-0.0568091	-0.0912		62.4149	56.6003	60.6076	70.0367	62.9918	61.4442	48.5294	62.482	53.7037	59.3023	59.9709	59.6154	61.0526	62.0227	64.9573	61.7816	63.8467	68.7285	63.7409	64.1975
Allocentrotus fragilis	58.94	-0.022735	-0.110353		58.2963	54.146	59.9006	60.8423	60.1151	60.4771	50.7937	60.1164	55.5556	55.8349	57.2052	57.1795	57.2807	58.8235	60.6061	55.7471	57.5036	61.8557	58.3725	62.8283
Hemicentrotus pulcherrimus	59.78	-0.0234192	-0.114868		59.2583	53.822	60.1047	63.8482	60.6584	60.2061	58.3333	60.8443	54.9383	56.4797	58.2242	57.1795	58.9474	61.4035	62.2159	58.908	58.5859	60.8247	58.7898	62.3457
Mesocentrotus franciscanus	59.4	0.0003367	-0.141168		58.8112	53.5219	59.911	63.0008	59.3296	59.6389	54.0323	61.5721	56.1728	56.4152	57.4964	56.9231	58.5088	59.4427	60.8902	55.1724	58.8023	60.1375	59.2999	60.6996
Mesocentrotus nudus	58.91	-0.00288576	-0.14091		58.0783	53.5182	59.9006	60.8161	60.748	59.6649	62.963	59.8253	55.5556	56.0284	57.3508	57.3077	56.1404	58.6171	58.5227	56.0345	57.7922	62.543	58.7376	62.0202
Pseudocentrotus depressus	60.07	0.0251373	-0.17986		59.4385	54.3291	60.0052	63.9812	61.7719	60.2837	56.7797	61.7176	56.1728	56.931	57.2052	57.8205	58.7052	60.1651	61.9318	55.4598	59.3795	62.543	59.9896	62.2222
Strongylocentrotus droebachiensis	59.26	-0.0215997	-0.112911		58.645	54.3291	59.9006	61.7055	60.2385	60.735	51.5873	58.952	55.5556	55.706	57.0597	57.4359	58.5088	59.1331	61.9318	56.8966	58.4416	61.512	58.5811	62.2222
Strongylocentrotus intermedius	58.99	-0.0306832	-0.108022		58.3399	54.2244	59.8221	60.9731	59.9342	60.4126	60.5505	59.2431	55.5556	56.4797	55.7496	57.0513	56.6667	58.9267	60.2273	57.4713	58.5137	60.1375	58.9984	61.4141
Strongylocentrotus pallidus	58.95	-0.021883	-0.113276		58.3399	54.2506	60.0052	60.7638	60.0082	60.6314	49.6063	59.6798	54.9383	55.5126	56.3319	56.5385	57.8947	57.8947	60.6061	56.6092	58.0087	62.543	58.7898	63.4343
Strongylocentrotus purpuratus	58.98	-0.0254323	-0.104827		58.4096	54.2506	60.0837	60.8946	60.0083	60.4275	47.9339	60.1732	57.5758	56.2218	56.7686	57.6923	56.7544	59.6273	60.8902	55.1724	57.8644	60.4811	58.8697	61.4141
Colobocentrotus mertensii	57.84	-0.0155602	-0.094617		57.0244	54.0838	59.5812	57.4084	59.5432	58.8008	52.6316	58.952	51.2346	53.8362	56.1863	55.2564	54.9123	58.8235	59.375	54.3103	56.4996	63.5739	58.529	56.3636
Echinometra mathaei	59.21	0.00962675	-0.131437		58.6475	53.7435	60.0262	62.1728	58.2492	60.0387	53.6	61.5721	49.3827	56.8021	58.5153	56.6667	58.2456	58.7203	61.4583	56.0345	57.7201	62.1993	58.5811	58.2305
Echinometra sp.	59.19	0.0099679	-0.132566		58.6649	53.6911	59.9738	62.3298	60.173	60	51.5873	61.1354	49.3827	56.4797	58.5153	57.4359	58.4211	58.4107	61.8371	56.0345	57.6479	62.1993	58.3725	59.465
Heliocidaris crassispina	58.89	0.0538292	-0.1856		58.1022	53.0612	59.9424	61.303	60.7084	60.4771	51.2397	59.2431	53.0864	55.3191	57.2052	56.5385	57.6316	60.5779	60.322	55.7471	57.1429	62.1993	58.7252	58.1818
Heterocentrotus mammillatus	58.91	0.0147683	-0.146264		58.3399	53.7798	59.8744	61.3654	60.1723	59.4839	53.5714	57.6419	50	55.9639	55.8952	56.6667	58.4211	59.0299	62.9735	58.046	57.2872	61.1684	58.3203	61.8182
Loxechinus albus	60.83	0.0248233	-0.139939		60.541	54.3717	60.4188	66.8325	61.5353	60.129	55.4745	62.1543	48.1481	57.8981	58.952	57.5641	59.7368	60.0619	63.6364	61.2069	60.6061	64.9485	60.8242	63.5802
Paracentrotus lividus	60.31	0.0203946	-0.134291		59.7088	53.8321	59.9529	65.3414	61.6776	61.4738	49.2424	59.7701	47.5309	57.3823	58.8064	59.1026	58.5088	60.0619	61.9318	59.2593	59.4828	64.2612	59.5611	61.25
Pseudoboletia maculata	58.93	0.0123876	-0.120039		58.2373	53.0628	59.3979	62.2513	59.8684	61.2508	49.6241	58.3697	56.7901	57.1244	56.9141	55.1282	58.2456	58.9267	59.1856	56.8966	58.8962	60.1375	58.7376	59.596
Tripneustes gratilla	59.8	0.0458194	-0.163474		59.4746	53.4695	59.8848	65.0694	60.0823	60.1804	52.0661	60.4076	56.7901	58.4139	57.0597	57.1795	57.7193	61.4035	62.7841	58.6207	59.1631	61.512	59.2999	60.6996
Lytechinus variegatus	58.52	0.00273411	-0.138588		57.5892	52.6839	59.7539	60.3299	60.6936	60.5026	53.9062	58.3697	58.4906	56.0284	55.7496	55.641	56.6667	58.2043	60.8902	58.3333	57.5036	60.4811	57.6943	58.4362
Mespilia globulus	62.27	0.0942669	-0.168301		61.6867	55.6253	60.3087	69.1261	60.1924	62.4274	56.0241	61.5721	44.4444	59.1231	58.8064	60	58.3333	61.7131	62.9735	65.5172	63.8528	63.2302	62.9049	63.6364
Salmacis bicolor rarispina	60.27	0.132902	-0.205135		59.434	52.8302	59.9843	65.4874	62.3709	60.9173	59.7826	59.8253	46.2963	56.931	56.7686	58.5897	59.2105	58.3075	60.6061	58.3333	61.0748	60.8247	59.7701	62.7572
Salmacis sphaeroides	61.88	0.0946994	-0.137234		61.4693	55.2935	60.2463	68.8679	62.7984	61.1362	59.7765	61.7176	45.679	58.8652	60.1164	60.5128	60.7018	61.4035	63.3523	60.6322	62.2367	67.6976	61.651	62.3457
Temnopleurus hardwickii	62.34	0.08983	-0.149761		61.9235	54.3763	59.9581	71.4361	63.4631	62.3142	57.0513	63.7555	43.2099	58.9942	60.5531	60.2564	61.9298	62.2291	63.8258	60.6322	61.7284	65.9794	62.1212	64.8148
Temnopleurus reevesii	62.34	0.0295156	-0.0971853		62.1069	55.2673	59.9319	71.1216	62.5312	62.2898	53.6585	63.7555	46.2963	60.0258	58.3697	59.8718	60.4386	61.7131	62.8788	62.069	62.5272	68.0412	64.3156	62.7572
Temnopleurus toreumaticus	61.88	0.112476	-0.177859		61.3732	53.5115	60.0891	70.5189	62.8418	61.9755	57.485	62.591	43.8272	59.3166	58.8064	59.2308	60.0877	60.4747	63.1629	59.1954	62.8903	67.354	61.651	64.8148
Sterechinus neumayeri	60.82	-0.0207169	-0.082419		60.637	54.7382	60.5236	66.6492	61.4781	59.871	50.3704	61.8632	49.3827	57.6402	59.9709	58.5897	59.9123	61.3003	61.6477	57.4713	61.2554	62.8866	61.9197	62.3457
Eucidaris tribuloides	59.71	0.0497404	-0.186104		59.2186	54.0816	60.2826	63.2915	60.5549	60.9284	52.4476	60.5531	46.0606	56.8665	57.7875	56.5385	60.0877	59.7523	60.9848	60.9195	59.3952	59.1065	59.6766	59.6708
Stylocidaris reini	59.93	0.0986151	-0.230347		59.4571	54.0979	60.0419	64.2315	60.2236	61.6474	53.8462	59.0975	45.4545	57.4468	56.9141	56.4103	59.4737	60.1651	60.7008	61.2069	60.276	63.2302	60.1042	60.4938
Prionocidaris baculosa	59.19	0.0728164	-0.180392		58.8112	54.1503	59.8848	62.3985	59.3587	60.6431	48.9051	58.3697	45.4545	57.5113	56.9141	56.0256	59.0351	59.5459	61.6477	55.1724	59.3478	59.1065	59.8852	57.6132
Stomopneustes variolaris	59.77	-0.00786348	-0.170271		59.1603	54.3074	59.911	63.2626	61.5039	60.3359	52.7607	61.5721	56.5476	56.4152	59.3886	57.5641	57.8947	60.2683	64.3939	55.4598	58.8534	60.1375	59.2071	58.0247
Pygmaeocidaris prionigera	58.57	0.0244152	-0.230806		57.9319	51.4398	60.4188	61.9372	58.9439	59.3932	59.8227	59.6798	61.2121	56.4152	56.7686	56.1538	56.3158	58.4107	58.9015	58.908	56.1328	61.512	58.3595	64.8148
Aspidodiadema arcitum	60.35	-0.0525269	-0.184868		59.8411	54.5431	59.9895	64.9908	60.7203	61.7021	56.9395	61.8632	56.3636	58.285	57.4964	55.3846	59.7198	63.9835	59.7538	59.4828	58.6357	57.9545	60.4167	64.1975
Caenopedina pulchella	65.68	0.0752132	-0.20338		65.7495	59.3553	61.5304	76.3627	65.1546	64.1424	53.0973	67.9767	47.8788	61.3798	63.1732	61.2821	64.8246	65.3251	68.5606	63.5057	65.7475	69.3182	67.9226	71.8107
Phormosoma bursarium	59.94	0.00266934	-0.180025		59.1389	54.5717	59.5232	63.322	60.8902	61.7021	52.1429	60.262	53.3333	58.5429	57.933	55.8974	58.9317	60.1651	60.7008	57.7586	59.1437	62.1212	58.7252	60.6996
Araeosoma owstoni	62.48	0.122599	-0.278059		62.4138	57.1129	60.9641	69.1643	61.4149	62.1604	57.4257	63.6099	44.2424	58.5429	62.591	58.8462	61.5789	62.5387	65.0568	60.3448	62.4819	61.7424	64.4201	64.8148

## Sheet: Codon usage and RSCU values
	Codon	UUU(F)	UUC(F)	UUA(L)	UUG(L)	CUU(L)	CUC(L)	CUA(L)	CUG(L)	AUU(I)	AUC(I)	AUA(M)	AUG(M)	GUU(V)	GUC(V)	GUA(V)	GUG(V)	UCU(S)	UCC(S)	UCA(S)	UCG(S)	CCU(P)	CCC(P)	CCA(P)	CCG(P)	ACU(T)	ACC(T)	ACA(T)	ACG(T)	GCU(A)	GCC(A)	GCA(A)	GCG(A)	UAU(Y)	UAC(Y)	CAU(H)	CAC(H)	CAA(Q)	CAG(Q)	AAU(N)	AAC(N)	AAA(K)	AAG(K)	GAU(D)	GAC(D)	GAA(E)	GAG(E)	UGU(C)	UGC(C)
Diadema setosum	Count	190	122	122	65	149	93	156	45	149	86	101	99	81	51	87	28	129	65	71	16	47	53	61	9	79	100	70	13	100	115	70	11	53	58	36	51	61	30	28	50	63	50	31	39	60	33	12	17
	RSCU	1.22	0.78	1.16	0.62	1.42	0.89	1.49	0.43	1.27	0.73	1.01	0.99	1.31	0.83	1.41	0.45	2.67	1.34	1.47	0.33	1.11	1.25	1.44	0.21	1.21	1.53	1.07	0.2	1.35	1.55	0.95	0.15	0.95	1.05	0.83	1.17	1.34	0.66	0.72	1.28	1.12	0.88	0.89	1.11	1.29	0.71	0.83	1.17
Echinothrix calamaris	Count	163	149	103	47	136	92	184	70	146	89	97	96	92	49	73	38	77	115	60	24	52	46	55	16	82	96	56	28	106	130	48	19	46	67	32	52	56	34	36	45	64	50	34	34	55	38	9	20
	RSCU	1.04	0.96	0.98	0.45	1.29	0.87	1.75	0.66	1.24	0.76	1.01	0.99	1.46	0.78	1.16	0.6	1.63	2.44	1.27	0.51	1.23	1.09	1.3	0.38	1.25	1.47	0.85	0.43	1.4	1.72	0.63	0.25	0.81	1.19	0.76	1.24	1.24	0.76	0.89	1.11	1.12	0.88	1	1	1.18	0.82	0.62	1.38
Echinothrix diadema	Count	203	113	130	70	143	84	148	54	142	79	101	102	81	49	78	41	121	67	68	23	50	39	53	27	77	97	66	20	108	121	62	21	56	56	31	54	59	35	25	46	58	50	33	38	63	31	16	13
	RSCU	1.28	0.72	1.24	0.67	1.36	0.8	1.41	0.52	1.29	0.71	1	1	1.3	0.79	1.25	0.66	2.49	1.38	1.4	0.47	1.18	0.92	1.25	0.64	1.18	1.49	1.02	0.31	1.38	1.55	0.79	0.27	1	1	0.73	1.27	1.26	0.74	0.7	1.3	1.07	0.93	0.93	1.07	1.34	0.66	1.1	0.9
Echinocardium cordatum	Count	191	100	140	65	109	63	162	60	134	53	192	101	86	54	84	44	95	56	76	21	22	59	76	17	58	73	88	37	78	106	89	28	62	47	27	57	63	20	33	43	87	54	18	49	62	40	14	17
	RSCU	1.31	0.69	1.4	0.65	1.09	0.63	1.62	0.6	1.43	0.57	1.31	0.69	1.28	0.81	1.25	0.66	2.15	1.27	1.72	0.47	0.51	1.36	1.75	0.39	0.91	1.14	1.38	0.58	1.04	1.41	1.18	0.37	1.14	0.86	0.64	1.36	1.52	0.48	0.87	1.13	1.23	0.77	0.54	1.46	1.22	0.78	0.9	1.1
Nacospatangus alta	Count	203	95	172	60	96	51	165	47	124	42	214	104	76	41	99	47	100	56	81	24	35	37	78	21	88	62	91	27	78	74	99	23	51	60	28	52	68	16	26	32	107	58	19	46	64	36	14	15
	RSCU	1.36	0.64	1.75	0.61	0.97	0.52	1.68	0.48	1.49	0.51	1.35	0.65	1.16	0.62	1.51	0.71	2.13	1.19	1.73	0.51	0.82	0.87	1.82	0.49	1.31	0.93	1.36	0.4	1.14	1.08	1.45	0.34	0.92	1.08	0.7	1.3	1.62	0.38	0.9	1.1	1.3	0.7	0.58	1.42	1.28	0.72	0.97	1.03
Sinaechinocyamus mai	Count	230	89	218	31	138	56	155	26	149	61	193	99	88	32	78	13	120	46	97	8	69	36	64	4	79	58	102	5	98	74	94	9	64	52	36	42	73	14	42	56	77	52	30	38	77	14	11	18
	RSCU	1.44	0.56	2.1	0.3	1.33	0.54	1.49	0.25	1.42	0.58	1.32	0.68	1.67	0.61	1.48	0.25	2.59	0.99	2.1	0.17	1.6	0.83	1.48	0.09	1.3	0.95	1.67	0.08	1.43	1.08	1.37	0.13	1.1	0.9	0.92	1.08	1.68	0.32	0.86	1.14	1.19	0.81	0.88	1.12	1.69	0.31	0.76	1.24
Glyptocidaris crenularis	Count	204	104	127	55	168	77	155	40	174	75	97	97	90	44	74	28	103	71	60	14	48	50	62	11	68	92	77	20	88	111	84	15	63	48	30	50	58	21	28	58	69	49	31	34	62	36	19	12
	RSCU	1.32	0.68	1.23	0.53	1.62	0.74	1.5	0.39	1.4	0.6	1	1	1.53	0.75	1.25	0.47	2.28	1.57	1.33	0.31	1.12	1.17	1.45	0.26	1.06	1.43	1.2	0.31	1.18	1.49	1.13	0.2	1.14	0.86	0.75	1.25	1.47	0.53	0.65	1.35	1.17	0.83	0.95	1.05	1.27	0.73	1.23	0.77
Arbacia lixula	Count	238	87	194	77	118	47	146	26	150	46	170	100	103	32	99	24	125	54	74	11	69	43	50	7	87	70	79	7	114	69	79	18	75	41	31	45	68	17	46	44	82	52	36	29	61	30	21	12
	RSCU	1.46	0.54	1.91	0.76	1.16	0.46	1.44	0.26	1.53	0.47	1.26	0.74	1.6	0.5	1.53	0.37	2.64	1.14	1.56	0.23	1.63	1.02	1.18	0.17	1.43	1.15	1.3	0.12	1.63	0.99	1.13	0.26	1.29	0.71	0.82	1.18	1.6	0.4	1.02	0.98	1.22	0.78	1.11	0.89	1.34	0.66	1.27	0.73
Allocentrotus fragilis	Count	199	104	150	66	117	80	152	46	144	67	155	108	96	45	75	41	106	76	64	22	42	61	60	9	56	83	76	25	79	112	92	13	50	62	22	59	59	24	30	50	71	53	28	40	55	42	11	19
	RSCU	1.31	0.69	1.47	0.65	1.15	0.79	1.49	0.45	1.36	0.64	1.18	0.82	1.49	0.7	1.17	0.64	2.2	1.58	1.33	0.46	0.98	1.42	1.4	0.21	0.93	1.38	1.27	0.42	1.07	1.51	1.24	0.18	0.89	1.11	0.54	1.46	1.42	0.58	0.75	1.25	1.15	0.85	0.82	1.18	1.13	0.87	0.73	1.27
Hemicentrotus pulcherrimus	Count	192	112	152	61	130	64	160	46	154	58	155	102	103	42	82	33	99	87	68	13	53	42	65	10	61	70	80	24	98	102	86	12	58	55	24	55	61	22	22	62	71	55	29	39	67	30	12	17
	RSCU	1.26	0.74	1.49	0.6	1.27	0.63	1.57	0.45	1.45	0.55	1.21	0.79	1.58	0.65	1.26	0.51	2.09	1.84	1.44	0.27	1.25	0.99	1.53	0.24	1.04	1.19	1.36	0.41	1.32	1.37	1.15	0.16	1.03	0.97	0.61	1.39	1.47	0.53	0.52	1.48	1.13	0.87	0.85	1.15	1.38	0.62	0.83	1.17
Mesocentrotus franciscanus	Count	176	132	141	53	119	68	189	38	145	73	153	101	81	52	91	29	98	75	75	15	39	54	74	8	64	74	86	15	78	110	100	11	39	72	24	57	65	17	31	56	65	54	29	40	68	30	12	18
	RSCU	1.14	0.86	1.39	0.52	1.17	0.67	1.87	0.38	1.33	0.67	1.2	0.8	1.28	0.82	1.44	0.46	2.06	1.58	1.58	0.32	0.89	1.23	1.69	0.18	1.07	1.24	1.44	0.25	1.04	1.47	1.34	0.15	0.7	1.3	0.59	1.41	1.59	0.41	0.71	1.29	1.09	0.91	0.84	1.16	1.39	0.61	0.8	1.2
Mesocentrotus nudus	Count	178	135	141	54	106	75	191	42	141	76	145	102	78	51	92	36	88	90	75	12	39	56	67	8	60	77	80	18	69	117	108	12	46	64	20	60	58	24	35	54	70	51	24	45	63	33	9	20
	RSCU	1.14	0.86	1.39	0.53	1.04	0.74	1.88	0.41	1.3	0.7	1.17	0.83	1.21	0.79	1.43	0.56	1.83	1.88	1.56	0.25	0.92	1.32	1.58	0.19	1.02	1.31	1.36	0.31	0.9	1.53	1.41	0.16	0.84	1.16	0.5	1.5	1.41	0.59	0.79	1.21	1.16	0.84	0.7	1.3	1.31	0.69	0.62	1.38
Pseudocentrotus depressus	Count	165	144	158	34	101	88	202	32	153	77	157	99	69	40	97	25	88	84	85	7	40	47	76	7	65	82	92	12	89	98	95	9	38	74	24	57	67	14	28	57	74	55	25	44	71	25	7	22
	RSCU	1.07	0.93	1.54	0.33	0.99	0.86	1.97	0.31	1.33	0.67	1.23	0.77	1.19	0.69	1.68	0.43	1.86	1.78	1.8	0.15	0.94	1.11	1.79	0.16	1.04	1.31	1.47	0.19	1.22	1.35	1.31	0.12	0.68	1.32	0.59	1.41	1.65	0.35	0.66	1.34	1.15	0.85	0.72	1.28	1.48	0.52	0.48	1.52
Strongylocentrotus droebachiensis	Count	202	105	148	68	116	81	161	38	140	71	158	107	95	45	76	35	105	74	74	14	52	48	64	7	63	73	86	17	79	114	91	11	46	66	24	56	51	32	27	56	68	54	28	40	53	43	13	17
	RSCU	1.32	0.68	1.45	0.67	1.14	0.79	1.58	0.37	1.33	0.67	1.19	0.81	1.51	0.72	1.21	0.56	2.18	1.53	1.53	0.29	1.22	1.12	1.5	0.16	1.05	1.22	1.44	0.28	1.07	1.55	1.23	0.15	0.82	1.18	0.6	1.4	1.23	0.77	0.65	1.35	1.11	0.89	0.82	1.18	1.1	0.9	0.87	1.13
Strongylocentrotus intermedius	Count	198	109	150	73	122	80	142	45	139	71	153	105	92	47	80	41	111	71	71	14	45	55	62	8	61	76	83	21	81	116	83	16	47	64	30	50	59	24	24	58	65	55	29	39	54	42	12	18
	RSCU	1.29	0.71	1.47	0.72	1.2	0.78	1.39	0.44	1.32	0.68	1.19	0.81	1.42	0.72	1.23	0.63	2.31	1.48	1.48	0.29	1.06	1.29	1.46	0.19	1.01	1.26	1.38	0.35	1.09	1.57	1.12	0.22	0.85	1.15	0.75	1.25	1.42	0.58	0.59	1.41	1.08	0.92	0.85	1.15	1.13	0.88	0.8	1.2
Strongylocentrotus pallidus	Count	191	115	147	64	115	86	151	49	150	68	152	107	91	40	87	34	106	77	65	18	47	52	63	9	57	83	86	15	85	106	84	20	48	65	23	56	54	30	27	55	74	53	28	39	55	40	10	20
	RSCU	1.25	0.75	1.44	0.63	1.13	0.84	1.48	0.48	1.38	0.62	1.17	0.83	1.44	0.63	1.38	0.54	2.23	1.62	1.36	0.38	1.1	1.22	1.47	0.21	0.95	1.38	1.43	0.25	1.15	1.44	1.14	0.27	0.85	1.15	0.58	1.42	1.29	0.71	0.66	1.34	1.17	0.83	0.84	1.16	1.16	0.84	0.67	1.33
Strongylocentrotus purpuratus	Count	199	115	149	67	118	77	151	41	145	66	141	106	93	46	81	41	88	88	74	16	54	58	57	11	57	69	87	11	69	109	90	17	49	60	24	55	61	25	41	55	75	57	31	36	50	42	10	21
	RSCU	1.27	0.73	1.48	0.67	1.17	0.77	1.5	0.41	1.37	0.63	1.14	0.86	1.43	0.7	1.24	0.63	1.81	1.81	1.53	0.33	1.2	1.29	1.27	0.24	1.02	1.23	1.55	0.2	0.97	1.53	1.26	0.24	0.9	1.1	0.61	1.39	1.42	0.58	0.85	1.15	1.14	0.86	0.93	1.07	1.09	0.91	0.65	1.35
Colobocentrotus mertensii	Count	165	147	139	82	118	48	159	71	124	83	127	101	74	50	93	52	82	88	65	28	41	33	75	19	67	84	82	25	75	91	92	30	32	80	22	57	58	24	26	65	58	54	20	52	57	38	6	24
	RSCU	1.06	0.94	1.35	0.8	1.15	0.47	1.55	0.69	1.2	0.8	1.11	0.89	1.1	0.74	1.38	0.77	1.68	1.81	1.33	0.57	0.98	0.79	1.79	0.45	1.04	1.3	1.27	0.39	1.04	1.26	1.28	0.42	0.57	1.43	0.56	1.44	1.41	0.59	0.57	1.43	1.04	0.96	0.56	1.44	1.2	0.8	0.4	1.6
Echinometra mathaei	Count	165	147	139	82	118	48	159	71	124	83	127	101	74	50	93	52	82	88	65	28	41	33	75	19	67	84	82	25	75	91	92	30	32	80	22	57	58	24	26	65	58	54	20	52	57	38	6	24
	RSCU	1.06	0.94	1.35	0.8	1.15	0.47	1.55	0.69	1.2	0.8	1.11	0.89	1.1	0.74	1.38	0.77	1.68	1.81	1.33	0.57	0.98	0.79	1.79	0.45	1.04	1.3	1.27	0.39	1.04	1.26	1.28	0.42	0.57	1.43	0.56	1.44	1.41	0.59	0.57	1.43	1.04	0.96	0.56	1.44	1.2	0.8	0.4	1.6
Echinometra sp.	Count	182	134	144	36	111	68	189	50	140	81	132	106	78	47	96	44	83	83	82	19	43	32	72	16	72	68	90	24	70	94	111	17	40	72	26	57	68	12	34	55	76	50	22	45	70	26	9	21
	RSCU	1.15	0.85	1.44	0.36	1.11	0.68	1.9	0.5	1.27	0.73	1.11	0.89	1.18	0.71	1.45	0.66	1.74	1.74	1.72	0.4	1.06	0.79	1.77	0.39	1.13	1.07	1.42	0.38	0.96	1.29	1.52	0.23	0.71	1.29	0.63	1.37	1.7	0.3	0.76	1.24	1.21	0.79	0.66	1.34	1.46	0.54	0.6	1.4
Heliocidaris crassispina	Count	129	179	116	30	84	81	263	41	125	101	144	99	63	50	94	33	71	82	99	17	26	36	88	16	54	89	100	6	70	104	101	15	45	72	18	62	74	9	22	66	73	54	20	46	77	21	8	24
	RSCU	0.84	1.16	1.13	0.29	0.82	0.79	2.57	0.4	1.11	0.89	1.19	0.81	1.05	0.83	1.57	0.55	1.47	1.7	2.05	0.35	0.63	0.87	2.12	0.39	0.87	1.43	1.61	0.1	0.97	1.43	1.39	0.21	0.77	1.23	0.45	1.55	1.78	0.22	0.5	1.5	1.15	0.85	0.61	1.39	1.57	0.43	0.5	1.5
Heterocentrotus mammillatus	Count	158	154	147	43	131	45	197	45	134	92	145	102	59	48	99	36	76	97	80	12	38	35	84	10	64	71	98	7	72	111	106	19	37	74	20	61	68	14	33	61	65	53	18	55	67	28	5	25
	RSCU	1.01	0.99	1.45	0.42	1.29	0.44	1.94	0.44	1.19	0.81	1.17	0.83	0.98	0.79	1.64	0.6	1.59	2.03	1.68	0.25	0.91	0.84	2.01	0.24	1.07	1.18	1.63	0.12	0.94	1.44	1.38	0.25	0.67	1.33	0.49	1.51	1.66	0.34	0.7	1.3	1.1	0.9	0.49	1.51	1.41	0.59	0.33	1.67
Loxechinus albus	Count	217	100	151	41	101	48	222	29	158	64	159	102	82	33	103	27	92	85	74	12	26	39	92	10	71	59	88	15	71	103	109	16	36	76	25	55	70	14	39	56	79	55	27	41	71	27	7	21
	RSCU	1.37	0.63	1.53	0.42	1.02	0.49	2.25	0.29	1.42	0.58	1.22	0.78	1.34	0.54	1.68	0.44	1.94	1.79	1.56	0.25	0.62	0.93	2.2	0.24	1.22	1.01	1.51	0.26	0.95	1.38	1.46	0.21	0.64	1.36	0.63	1.38	1.67	0.33	0.82	1.18	1.18	0.82	0.79	1.21	1.45	0.55	0.5	1.5
Paracentrotus lividus	Count	208	109	126	52	111	52	197	52	146	53	165	102	69	48	98	26	94	70	83	11	39	60	66	9	65	79	94	12	75	102	107	24	51	60	22	56	70	14	44	50	88	54	25	41	72	31	9	21
	RSCU	1.31	0.69	1.28	0.53	1.13	0.53	2	0.53	1.47	0.53	1.24	0.76	1.15	0.8	1.63	0.43	2.07	1.54	1.82	0.24	0.9	1.38	1.52	0.21	1.04	1.26	1.5	0.19	0.97	1.32	1.39	0.31	0.92	1.08	0.56	1.44	1.67	0.33	0.94	1.06	1.24	0.76	0.76	1.24	1.4	0.6	0.6	1.4
Pseudoboletia maculata	Count	183	117	115	58	117	65	198	63	136	66	154	105	89	35	100	25	82	71	95	15	35	49	78	13	66	75	97	20	80	102	100	13	39	76	21	59	61	21	30	57	64	52	25	42	59	37	10	22
	RSCU	1.22	0.78	1.12	0.56	1.14	0.63	1.93	0.61	1.35	0.65	1.19	0.81	1.43	0.56	1.61	0.4	1.72	1.49	1.99	0.31	0.8	1.12	1.78	0.3	1.02	1.16	1.5	0.31	1.08	1.38	1.36	0.18	0.68	1.32	0.53	1.48	1.49	0.51	0.69	1.31	1.1	0.9	0.75	1.25	1.23	0.77	0.63	1.38
Tripneustes gratilla	Count	208	93	121	46	93	76	245	39	132	78	166	97	78	40	89	28	73	81	89	17	32	45	86	11	55	76	117	10	68	107	97	16	37	77	23	55	65	17	35	52	82	53	18	47	76	21	10	20
	RSCU	1.38	0.62	1.17	0.45	0.9	0.74	2.37	0.38	1.26	0.74	1.26	0.74	1.33	0.68	1.51	0.48	1.57	1.74	1.91	0.36	0.74	1.03	1.98	0.25	0.85	1.18	1.81	0.16	0.94	1.49	1.35	0.22	0.65	1.35	0.59	1.41	1.59	0.41	0.8	1.2	1.21	0.79	0.55	1.45	1.57	0.43	0.67	1.33
Lytechinus variegatus	Count	183	125	104	59	120	78	193	56	129	82	145	99	92	54	89	31	97	79	72	19	36	61	65	10	48	81	97	19	69	109	93	24	38	76	18	60	65	16	24	60	72	53	27	41	65	28	10	21
	RSCU	1.19	0.81	1.02	0.58	1.18	0.77	1.9	0.55	1.22	0.78	1.19	0.81	1.38	0.81	1.34	0.47	2.03	1.65	1.51	0.4	0.84	1.42	1.51	0.23	0.78	1.32	1.58	0.31	0.94	1.48	1.26	0.33	0.67	1.33	0.46	1.54	1.6	0.4	0.57	1.43	1.15	0.85	0.79	1.21	1.4	0.6	0.65	1.35
Mespilia globulus	Count	178	122	135	46	96	61	222	32	122	59	236	102	70	28	93	26	66	80	104	11	32	46	84	5	51	66	131	15	65	89	118	18	52	62	26	52	74	11	24	36	129	52	22	41	84	12	17	12
	RSCU	1.19	0.81	1.37	0.47	0.97	0.62	2.25	0.32	1.35	0.65	1.4	0.6	1.29	0.52	1.71	0.48	1.4	1.7	2.21	0.23	0.77	1.1	2.01	0.12	0.78	1	1.99	0.23	0.9	1.23	1.63	0.25	0.91	1.09	0.67	1.33	1.74	0.26	0.8	1.2	1.43	0.57	0.7	1.3	1.75	0.25	1.17	0.83
Salmacis bicolor rarispina	Count	151	147	81	24	71	66	316	40	97	71	234	100	62	25	118	19	51	92	113	13	24	53	88	7	39	80	134	11	51	109	118	19	41	72	13	64	74	10	13	57	107	52	18	52	74	20	8	21
	RSCU	1.01	0.99	0.81	0.24	0.71	0.66	3.17	0.4	1.15	0.85	1.4	0.6	1.11	0.45	2.11	0.34	1.09	1.97	2.42	0.28	0.56	1.23	2.05	0.16	0.59	1.21	2.03	0.17	0.69	1.47	1.59	0.26	0.73	1.27	0.34	1.66	1.76	0.24	0.37	1.63	1.35	0.65	0.51	1.49	1.57	0.43	0.55	1.45
Salmacis sphaeroides	Count	197	108	162	43	77	51	217	48	118	44	225	105	52	31	124	26	67	75	110	16	32	28	101	6	44	67	129	21	48	97	131	18	45	67	22	56	72	13	29	35	117	53	28	39	69	26	15	14
	RSCU	1.29	0.71	1.63	0.43	0.77	0.51	2.18	0.48	1.46	0.54	1.36	0.64	0.89	0.53	2.13	0.45	1.45	1.62	2.38	0.35	0.77	0.67	2.42	0.14	0.67	1.03	1.98	0.32	0.65	1.32	1.78	0.24	0.8	1.2	0.56	1.44	1.69	0.31	0.91	1.09	1.38	0.62	0.84	1.16	1.45	0.55	1.03	0.97
Temnopleurus hardwickii	Count	196	99	136	28	99	54	239	28	137	44	215	98	70	31	114	22	65	60	113	13	40	31	86	12	56	68	148	12	72	84	126	14	62	53	30	48	77	8	26	48	115	50	26	43	73	19	9	21
	RSCU	1.33	0.67	1.4	0.29	1.02	0.55	2.46	0.29	1.51	0.49	1.37	0.63	1.18	0.52	1.92	0.37	1.48	1.37	2.58	0.3	0.95	0.73	2.04	0.28	0.79	0.96	2.08	0.17	0.97	1.14	1.7	0.19	1.08	0.92	0.77	1.23	1.81	0.19	0.7	1.3	1.39	0.61	0.75	1.25	1.59	0.41	0.6	1.4
Temnopleurus reevesii	Count	207	91	177	49	121	37	176	38	135	29	211	106	98	28	87	35	88	63	99	10	55	52	51	8	72	61	116	8	79	89	118	13	61	54	32	45	72	15	33	31	108	51	33	37	68	22	17	14
	RSCU	1.39	0.61	1.78	0.49	1.21	0.37	1.77	0.38	1.65	0.35	1.33	0.67	1.58	0.45	1.4	0.56	1.88	1.34	2.11	0.21	1.33	1.25	1.23	0.19	1.12	0.95	1.81	0.12	1.06	1.19	1.58	0.17	1.06	0.94	0.83	1.17	1.66	0.34	1.03	0.97	1.36	0.64	0.94	1.06	1.51	0.49	1.1	0.9
Temnopleurus toreumaticus	Count	192	111	110	22	93	57	278	27	112	53	238	100	81	37	95	16	49	74	126	5	25	40	101	3	45	71	145	15	66	87	138	7	35	77	24	57	75	9	26	45	107	52	22	45	84	13	9	21
	RSCU	1.27	0.73	1.12	0.22	0.95	0.58	2.84	0.28	1.36	0.64	1.41	0.59	1.41	0.65	1.66	0.28	1.11	1.68	2.86	0.11	0.59	0.95	2.39	0.07	0.65	1.03	2.1	0.22	0.89	1.17	1.85	0.09	0.63	1.38	0.59	1.41	1.79	0.21	0.73	1.27	1.35	0.65	0.66	1.34	1.73	0.27	0.6	1.4
Sterechinus neumayeri	Count	246	74	160	72	120	41	171	37	148	53	155	111	104	36	85	30	95	60	76	24	33	51	78	8	83	57	75	22	101	91	85	25	54	58	28	56	65	20	36	50	83	55	31	37	73	23	11	18
	RSCU	1.54	0.46	1.6	0.72	1.2	0.41	1.71	0.37	1.47	0.53	1.17	0.83	1.63	0.56	1.33	0.47	2.08	1.31	1.66	0.52	0.78	1.2	1.84	0.19	1.4	0.96	1.27	0.37	1.34	1.21	1.13	0.33	0.96	1.04	0.67	1.33	1.53	0.47	0.84	1.16	1.2	0.8	0.91	1.09	1.52	0.48	0.76	1.24
Eucidaris tribuloides	Count	189	139	127	38	74	81	237	53	131	73	177	91	73	40	94	23	64	78	88	9	45	38	84	5	55	96	109	20	62	108	97	17	43	69	21	60	72	13	25	63	80	58	14	52	67	27	9	20
	RSCU	1.15	0.85	1.25	0.37	0.73	0.8	2.33	0.52	1.28	0.72	1.32	0.68	1.27	0.7	1.63	0.4	1.46	1.78	2.01	0.21	1.05	0.88	1.95	0.12	0.79	1.37	1.56	0.29	0.87	1.52	1.37	0.24	0.77	1.23	0.52	1.48	1.69	0.31	0.57	1.43	1.16	0.84	0.42	1.58	1.43	0.57	0.62	1.38
Stylocidaris reini	Count	161	157	99	32	78	84	282	37	104	84	206	91	65	33	95	13	56	85	98	15	22	32	104	10	51	85	141	14	51	102	117	10	24	88	18	63	81	10	25	65	87	53	23	45	78	12	3	27
	RSCU	1.01	0.99	0.97	0.31	0.76	0.82	2.76	0.36	1.11	0.89	1.39	0.61	1.26	0.64	1.84	0.25	1.22	1.85	2.14	0.33	0.52	0.76	2.48	0.24	0.7	1.17	1.94	0.19	0.73	1.46	1.67	0.14	0.43	1.57	0.44	1.56	1.78	0.22	0.56	1.44	1.24	0.76	0.68	1.32	1.73	0.27	0.2	1.8
Prionocidaris baculosa	Count	163	155	100	44	84	82	241	60	98	83	203	92	56	42	97	22	59	77	97	24	26	29	93	18	56	80	130	21	63	89	107	22	38	72	20	62	76	14	34	55	82	53	22	47	70	20	8	22
	RSCU	1.03	0.97	0.98	0.43	0.82	0.81	2.37	0.59	1.08	0.92	1.38	0.62	1.03	0.77	1.79	0.41	1.25	1.63	2.06	0.51	0.63	0.7	2.24	0.43	0.78	1.11	1.81	0.29	0.9	1.27	1.52	0.31	0.69	1.31	0.49	1.51	1.69	0.31	0.76	1.24	1.21	0.79	0.64	1.36	1.56	0.44	0.53	1.47
Stomopneustes variolaris	Count	237	79	151	53	116	76	194	27	140	106	106	97	80	56	90	24	73	96	100	9	34	36	76	14	63	76	89	10	84	120	87	8	49	68	17	63	65	17	34	63	65	54	24	42	66	29	9	19
	RSCU	1.5	0.5	1.47	0.52	1.13	0.74	1.89	0.26	1.14	0.86	1.04	0.96	1.28	0.9	1.44	0.38	1.45	1.91	1.99	0.18	0.85	0.9	1.9	0.35	1.06	1.28	1.5	0.17	1.12	1.61	1.16	0.11	0.84	1.16	0.42	1.57	1.59	0.41	0.7	1.3	1.09	0.91	0.73	1.27	1.39	0.61	0.64	1.36
Pygmaeocidaris prionigera	Count	164	144	106	10	94	128	266	23	144	104	131	93	67	45	99	17	70	109	55	4	50	77	48	2	64	114	88	3	90	117	79	9	49	69	27	54	82	13	32	59	69	54	34	34	77	20	15	16
	RSCU	1.06	0.94	1.01	0.1	0.9	1.22	2.55	0.22	1.16	0.84	1.17	0.83	1.18	0.79	1.74	0.3	1.69	2.63	1.33	0.1	1.13	1.74	1.08	0.05	0.95	1.7	1.31	0.04	1.22	1.59	1.07	0.12	0.83	1.17	0.67	1.33	1.73	0.27	0.7	1.3	1.12	0.88	1	1	1.59	0.41	0.97	1.03
Aspidodiadema arcitum	Count	216	105	177	20	150	103	140	32	160	86	125	98	80	45	81	19	98	87	63	13	67	56	47	5	102	73	67	13	100	95	85	6	58	57	29	54	66	14	33	49	83	52	33	38	62	26	13	16
	RSCU	1.35	0.65	1.71	0.19	1.45	0.99	1.35	0.31	1.3	0.7	1.12	0.88	1.42	0.8	1.44	0.34	2.09	1.85	1.34	0.28	1.53	1.28	1.07	0.11	1.6	1.15	1.05	0.2	1.4	1.33	1.19	0.08	1.01	0.99	0.7	1.3	1.65	0.35	0.8	1.2	1.23	0.77	0.93	1.07	1.41	0.59	0.9	1.1
Caenopedina pulchella	Count	189	115	212	13	80	58	236	3	138	51	291	92	50	18	84	9	84	49	125	7	33	19	108	5	86	55	138	3	91	74	79	3	60	61	42	38	83	4	53	38	132	45	31	35	81	6	14	14
	RSCU	1.24	0.76	2.11	0.13	0.8	0.58	2.35	0.03	1.46	0.54	1.52	0.48	1.24	0.45	2.09	0.22	1.85	1.08	2.75	0.15	0.8	0.46	2.62	0.12	1.22	0.78	1.96	0.04	1.47	1.2	1.28	0.05	0.99	1.01	1.05	0.95	1.91	0.09	1.16	0.84	1.49	0.51	0.94	1.06	1.86	0.14	1	1
Phormosoma bursarium	Count	215	104	136	58	116	73	195	34	139	92	147	89	87	32	93	10	81	79	70	15	45	64	64	4	84	100	90	10	69	115	89	17	51	63	25	58	67	17	37	55	61	54	20	52	69	23	11	19
	RSCU	1.35	0.65	1.33	0.57	1.14	0.72	1.91	0.33	1.2	0.8	1.25	0.75	1.57	0.58	1.68	0.18	1.77	1.73	1.53	0.33	1.02	1.45	1.45	0.09	1.18	1.41	1.27	0.14	0.95	1.59	1.23	0.23	0.89	1.11	0.6	1.4	1.6	0.4	0.8	1.2	1.06	0.94	0.56	1.44	1.5	0.5	0.73	1.27
Araeosoma owstoni	Count	138	150	146	19	87	84	269	12	107	119	251	92	45	23	83	7	63	69	122	7	24	19	124	1	61	84	158	4	73	92	83	0	37	77	36	51	86	4	30	52	118	48	27	40	84	5	8	20
	RSCU	0.96	1.04	1.42	0.18	0.85	0.82	2.62	0.12	0.95	1.05	1.46	0.54	1.14	0.58	2.1	0.18	1.4	1.54	2.72	0.16	0.57	0.45	2.95	0.02	0.79	1.09	2.06	0.05	1.18	1.48	1.34	0	0.65	1.35	0.83	1.17	1.91	0.09	0.73	1.27	1.42	0.58	0.81	1.19	1.89	0.11	0.57	1.43
[truncated: 14 more columns]
