# Supplementary material for: Complete mitochondrial genomes of four deep-sea echinoids: conserved mitogenome organization and new insights into the phylogeny and evolution of Echinoidea
Source: PeerJ. 2022 Jul 28;10:e13730. doi: 10.7717/peerj.13730 (PMC9339218; doi:10.7717/peerj.13730)
Supplement: Table S6 [file peerj-10-13730-s007.xls]

## Sheet: Sheet1
atp6
	NumOTU	Iss	Iss.cSym	T	DF	P	Iss.cAsym	T	DF	P
	4	0.372	0.807	19.422	701	0	0.776	18.038	701	0
	8	0.373	0.769	14.997	701	0	0.66	10.864	701	0
	16	0.386	0.749	12.09	701	0	0.54	5.141	701	0
	32	0.4	0.723	9.686	701	0	0.399	0.037	701	0.9706
atp8
	NumOTU	Iss	Iss.cSym	T	DF	P	Iss.cAsym	T	DF	P
	4	0.614	0.778	3.329	173	0.0011	0.777	3.303	173	0.0012
	8	0.645	0.74	1.567	173	0.1188	0.648	0.054	173	0.9568
	16	0.673	0.631	0.582	173	0.5612	0.453	3.037	173	0.0028
	32	0.702	0.701	0.006	173	0.9956	0.398	3.554	173	0.0005
cox1
	NumOTU	Iss	Iss.cSym	T	DF	P	Iss.cAsym	T	DF	P
	4	0.255	0.834	43.927	1553	0	0.804	41.667	1553	0
	8	0.252	0.811	37.22	1553	0	0.711	30.608	1553	0
	16	0.255	0.794	33.32	1553	0	0.612	22.088	1553	0
	32	0.256	0.777	30.899	1553	0	0.495	14.213	1553	0
cox2
	NumOTU	Iss	Iss.cSym	T	DF	P	Iss.cAsym	T	DF	P
	4	0.277	0.807	26.545	686	0	0.776	24.989	686	0
	8	0.273	0.768	22.215	686	0	0.659	17.307	686	0
	16	0.271	0.747	20.387	686	0	0.539	11.44	686	0
	32	0.276	0.721	18.652	686	0	0.396	5.055	686	0
cox3
	NumOTU	Iss	Iss.cSym	T	DF	P	Iss.cAsym	T	DF	P
	4	0.307	0.811	26.256	782	0	0.78	24.629	782	0
	8	0.312	0.775	21.082	782	0	0.667	16.157	782	0
	16	0.315	0.756	18.857	782	0	0.551	10.069	782	0
	32	0.32	0.73	16.729	782	0	0.411	3.712	782	0.0002
cytb
	NumOTU	Iss	Iss.cSym	T	DF	P	Iss.cAsym	T	DF	P
	4	0.32	0.825	31.042	1139	0	0.793	29.079	1139	0
	8	0.321	0.795	25.951	1139	0	0.691	20.256	1139	0
	16	0.328	0.779	23.416	1139	0	0.585	13.381	1139	0
	32	0.333	0.757	21.399	1139	0	0.459	6.346	1139	0
nad1
	NumOTU	Iss	Iss.cSym	T	DF	P	Iss.cAsym	T	DF	P
	4	0.384	0.82	22.492	980	0	0.788	20.844	980	0
	8	0.387	0.787	17.606	980	0	0.681	12.95	980	0
	16	0.4	0.77	14.473	980	0	0.572	6.703	980	0
	32	0.416	0.746	11.713	980	0	0.44	0.831	980	0.4061
nad2
	NumOTU	Iss	Iss.cSym	T	DF	P	Iss.cAsym	T	DF	P
	4	0.468	0.822	18.984	1061	0	0.79	17.268	1061	0
	8	0.49	0.791	14.03	1061	0	0.686	9.135	1061	0
	16	0.488	0.775	12.517	1061	0	0.579	3.974	1061	0.0001
	32	0.501	0.752	10.381	1061	0	0.45	2.132	1061	0.0332
nad3
	NumOTU	Iss	Iss.cSym	T	DF	P	Iss.cAsym	T	DF	P
	4	0.434	0.784	10.793	350	0	0.756	9.904	350	0
	8	0.443	0.738	7.958	350	0	0.628	4.987	350	0
	16	0.454	0.691	5.836	350	0	0.483	0.702	350	0.483
	32	0.456	0.686	5.304	350	0	0.356	2.311	350	0.0214
nad4
	NumOTU	Iss	Iss.cSym	T	DF	P	Iss.cAsym	T	DF	P
	4	0.42	0.831	25.632	1400	0	0.801	23.706	1400	0
	8	0.439	0.806	19.524	1400	0	0.705	14.135	1400	0
	16	0.443	0.789	16.823	1400	0	0.603	7.774	1400	0
	32	0.458	0.77	13.91	1400	0	0.484	1.126	1400	0.2602
nad4l
	NumOTU	Iss	Iss.cSym	T	DF	P	Iss.cAsym	T	DF	P
	4	0.4	0.78	11.077	293	0	0.756	10.372	293	0
	8	0.426	0.734	7.796	293	0	0.626	5.062	293	0
	16	0.434	0.676	5.58	293	0	0.471	0.846	293	0.3981
	32	0.445	0.682	5.086	293	0	0.354	1.965	293	0.0503
nad5
	NumOTU	Iss	Iss.cSym	T	DF	P	Iss.cAsym	T	DF	P
	4	0.493	0.84	24.063	1946	0	0.813	22.235	1946	0
	8	0.498	0.821	19.174	1946	0	0.726	13.532	1946	0
	16	0.513	0.804	15.507	1946	0	0.63	6.249	1946	0
	32	0.537	0.788	12.104	1946	0	0.517	0.97	1946	0.3323
nad6
	NumOTU	Iss	Iss.cSym	T	DF	P	Iss.cAsym	T	DF	P
	4	0.443	0.795	13.057	494	0	0.761	11.783	494	0
	8	0.45	0.751	9.582	494	0	0.639	6.03	494	0
	16	0.467	0.719	7.189	494	0	0.511	1.25	494	0.2117
	32	0.481	0.702	5.824	494	0	0.377	2.731	494	0.0065
The 1st and 2nd position
	NumOTU	Iss	Iss.cSym	T	DF	P	Iss.cAsym	T	DF	P
	4	0.206	0.854	117.731	7595	0	0.845	116.115	7595	0
	8	0.206	0.846	99.384	7595	0	0.766	86.987	7595	0
	16	0.223	0.842	84.176	7595	0	0.68	62.165	7595	0
	32	0.232	0.815	72.112	7595	0	0.571	41.896	7595	0
The 3rd position
	NumOTU	Iss	Iss.cSym	T	DF	P	Iss.cAsym	T	DF	P
	4	0.768	0.849	9.437	3798	0	0.837	8.066	3798	0
	8	0.775	0.842	7.765	3798	0	0.759	1.835	3798	0.0666
	16	0.783	0.827	5.092	3798	0	0.669	12.855	3798	0
	32	0.786	0.809	2.467	3798	0.0137	0.555	24.528	3798	0
